# Supplementary material for: Design of novel tetra-hetero[8]circulenes: a theoretical study of electronic structure and charge transport characteristics
Source: Royal Society of Chemistry journal article supplement (doi:10.1039/c4ra16485g), 2015-01-01
Supplement: c4ra16485g1.pdf [file c4ra16485g1.pdf]

## Electronic Supporting Information

# Design of novel tetra-hetero[8]circulenes: A theoretical study of electronic structure and charge transport characteristics

Vu Thi Thu Huong, Truong Ba Tai and Minh Tho Nguyen

**Supporting Information Available:** Table S1 contains the Cartesian coordinates for optimized geometries, Table S2 contains the intermolecular interaction energies of dimmers 1a-4a obtained at M06.

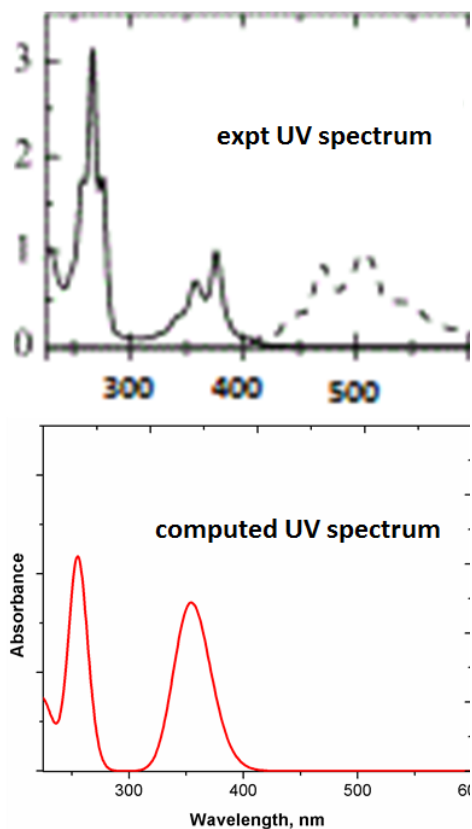

**Figure S1.** The experimental (up) and theoretical (down) UV spectra of compound **1a**. The experimental spectrum was obtained from ref. 18.

**Table S1.** Optimized geometries of the molecules at the B3LYP/6-31+G(d,p) level. Cartesian coordinates in angstroms

| <b>Comp</b> | <b>XYZ-coordinate</b> |              |              |             | <b>Comp</b>  | <b>XYZ-coordinate</b> |              |              |             |
|-------------|-----------------------|--------------|--------------|-------------|--------------|-----------------------|--------------|--------------|-------------|
| <b>1a</b>   | 6                     | 0.698105000  | 1.710155000  | 0.000000000 | <b>1b</b>    | 6                     | 0.698480000  | 1.712737000  | 0.000000000 |
|             | 6                     | -0.698105000 | 1.710155000  | 0.000000000 |              | 6                     | -0.698480000 | 1.712737000  | 0.000000000 |
|             | 6                     | 0.698105000  | -1.710155000 | 0.000000000 |              | 6                     | 0.698480000  | -1.712737000 | 0.000000000 |
|             | 6                     | -1.710155000 | 0.698105000  | 0.000000000 |              | 6                     | -1.712737000 | 0.698480000  | 0.000000000 |
|             | 6                     | -0.698105000 | -1.710155000 | 0.000000000 |              | 6                     | -0.698480000 | -1.712737000 | 0.000000000 |
|             | 6                     | -1.710155000 | -0.698105000 | 0.000000000 |              | 6                     | -1.712737000 | -0.698480000 | 0.000000000 |
|             | 6                     | 1.710155000  | 0.698105000  | 0.000000000 |              | 6                     | 1.712737000  | 0.698480000  | 0.000000000 |
|             | 6                     | 1.710155000  | -0.698105000 | 0.000000000 |              | 6                     | 1.712737000  | -0.698480000 | 0.000000000 |
|             | 6                     | 2.937181000  | -1.372047000 | 0.000000000 |              | 6                     | 2.933027000  | -1.382612000 | 0.000000000 |
|             | 6                     | 2.937181000  | 1.372047000  | 0.000000000 |              | 6                     | 2.933027000  | 1.382612000  | 0.000000000 |
|             | 6                     | 1.372047000  | 2.937181000  | 0.000000000 |              | 6                     | 1.382612000  | 2.933027000  | 0.000000000 |
|             | 6                     | -1.372047000 | 2.937181000  | 0.000000000 |              | 6                     | -1.382612000 | 2.933027000  | 0.000000000 |
|             | 6                     | -2.937181000 | 1.372047000  | 0.000000000 |              | 6                     | -2.933027000 | 1.382612000  | 0.000000000 |
|             | 6                     | -2.937181000 | -1.372047000 | 0.000000000 |              | 6                     | -2.933027000 | -1.382612000 | 0.000000000 |
|             | 6                     | -1.372047000 | -2.937181000 | 0.000000000 |              | 6                     | -1.382612000 | -2.933027000 | 0.000000000 |
|             | 6                     | 1.372047000  | -2.937181000 | 0.000000000 |              | 6                     | 1.382612000  | -2.933027000 | 0.000000000 |
|             | 6                     | -4.166548000 | 0.701163000  | 0.000000000 |              | 6                     | -4.156771000 | 0.700401000  | 0.000000000 |
|             | 6                     | -4.166548000 | -0.701163000 | 0.000000000 |              | 6                     | -4.156771000 | -0.700401000 | 0.000000000 |
|             | 6                     | -0.701163000 | 4.166548000  | 0.000000000 |              | 6                     | -0.700401000 | 4.156771000  | 0.000000000 |
|             | 6                     | 0.701163000  | 4.166548000  | 0.000000000 |              | 6                     | 0.700401000  | 4.156771000  | 0.000000000 |
|             | 6                     | 4.166548000  | 0.701163000  | 0.000000000 |              | 6                     | 4.156771000  | 0.700401000  | 0.000000000 |
|             | 6                     | 4.166548000  | -0.701163000 | 0.000000000 |              | 6                     | 4.156771000  | -0.700401000 | 0.000000000 |
|             | 6                     | 0.701163000  | -4.166548000 | 0.000000000 |              | 6                     | 0.700401000  | -4.156771000 | 0.000000000 |
|             | 6                     | -0.701163000 | -4.166548000 | 0.000000000 |              | 6                     | -0.700401000 | -4.156771000 | 0.000000000 |
|             | 1                     | 1.252591000  | -5.099793000 | 0.000000000 |              | 8                     | 2.749425000  | -2.749425000 | 0.000000000 |
|             | 1                     | -1.252591000 | -5.099793000 | 0.000000000 |              | 8                     | 2.749425000  | 2.749425000  | 0.000000000 |
|             | 1                     | -5.099793000 | 1.252591000  | 0.000000000 |              | 8                     | -2.749425000 | 2.749425000  | 0.000000000 |
|             | 1                     | -5.099793000 | -1.252591000 | 0.000000000 |              | 8                     | -2.749425000 | -2.749425000 | 0.000000000 |
| 1           | -1.252591000          | 5.099793000  | 0.000000000  | 9           | 1.356660000  | -5.321319000          | 0.000000000  |              |             |
| 1           | 1.252591000           | 5.099793000  | 0.000000000  | 9           | -1.356660000 | -5.321319000          | 0.000000000  |              |             |
| 1           | 5.099793000           | 1.252591000  | 0.000000000  | 9           | 5.321319000  | -1.356660000          | 0.000000000  |              |             |
| 1           | 5.099793000           | -1.252591000 | 0.000000000  | 9           | 5.321319000  | 1.356660000           | 0.000000000  |              |             |
| 8           | 2.743704000           | -2.743704000 | 0.000000000  | 9           | 1.356660000  | 5.321319000           | 0.000000000  |              |             |

|           |    |              |              |              |           |    |              |              |              |
|-----------|----|--------------|--------------|--------------|-----------|----|--------------|--------------|--------------|
|           | 8  | 2.743704000  | 2.743704000  | 0.000000000  |           | 9  | -1.356660000 | 5.321319000  | 0.000000000  |
|           | 8  | -2.743704000 | 2.743704000  | 0.000000000  |           | 9  | -5.321319000 | 1.356660000  | 0.000000000  |
|           | 8  | -2.743704000 | -2.743704000 | 0.000000000  |           | 9  | -5.321319000 | -1.356660000 | 0.000000000  |
| <b>2a</b> | 6  | 0.723758000  | 1.772717000  | 0.001335000  | <b>2b</b> | 6  | 1.609436000  | -1.027439000 | 0.000010000  |
|           | 6  | -0.723758000 | 1.772717000  | -0.001338000 |           | 6  | 1.868876000  | 0.391290000  | -0.000005000 |
|           | 6  | 0.723758000  | -1.772717000 | -0.001338000 |           | 6  | -1.868876000 | -0.391290000 | -0.000005000 |
|           | 6  | -1.772717000 | 0.723758000  | -0.001335000 |           | 6  | 1.027439000  | 1.609436000  | -0.000010000 |
|           | 6  | -0.723758000 | -1.772717000 | 0.001335000  |           | 6  | -1.609436000 | 1.027439000  | 0.000010000  |
|           | 6  | -1.772717000 | -0.723758000 | 0.001338000  |           | 6  | -0.391290000 | 1.868876000  | 0.000005000  |
|           | 6  | 1.772717000  | 0.723758000  | 0.001338000  |           | 6  | 0.391290000  | -1.868876000 | 0.000005000  |
|           | 6  | 1.772717000  | -0.723758000 | -0.001335000 |           | 6  | -1.027439000 | -1.609436000 | -0.000010000 |
|           | 6  | 3.064997000  | -1.332359000 | -0.003467000 |           | 6  | -1.868876000 | -2.759922000 | -0.000024000 |
|           | 6  | 3.064997000  | 1.332359000  | 0.003472000  |           | 6  | 0.770870000  | -3.242783000 | 0.000014000  |
|           | 6  | 1.332359000  | 3.064997000  | 0.003467000  |           | 6  | 2.759922000  | -1.868876000 | 0.000024000  |
|           | 6  | -1.332359000 | 3.064997000  | -0.003472000 |           | 6  | 3.242783000  | 0.770870000  | -0.000014000 |
|           | 6  | -3.064997000 | 1.332359000  | -0.003467000 |           | 6  | 1.868876000  | 2.759922000  | -0.000024000 |
|           | 6  | -3.064997000 | -1.332359000 | 0.003472000  |           | 6  | -0.770870000 | 3.242783000  | 0.000014000  |
|           | 6  | -1.332359000 | -3.064997000 | 0.003467000  |           | 6  | -2.759922000 | 1.868876000  | 0.000024000  |
|           | 6  | 1.332359000  | -3.064997000 | -0.003472000 |           | 6  | -3.242783000 | -0.770870000 | -0.000014000 |
|           | 6  | -4.302756000 | 0.683192000  | -0.002080000 |           | 6  | 1.441057000  | 4.085174000  | -0.000022000 |
|           | 6  | -4.302756000 | -0.683192000 | 0.002090000  |           | 6  | 0.098397000  | 4.330743000  | 0.000002000  |
|           | 6  | -0.683192000 | 4.302756000  | -0.002090000 |           | 6  | 4.330743000  | -0.098397000 | -0.000002000 |
|           | 6  | 0.683192000  | 4.302756000  | 0.002080000  |           | 6  | 4.085174000  | -1.441057000 | 0.000022000  |
|           | 6  | 4.302756000  | 0.683192000  | 0.002090000  |           | 6  | -0.098397000 | -4.330743000 | 0.000002000  |
|           | 6  | 4.302756000  | -0.683192000 | -0.002080000 |           | 6  | -1.441057000 | -4.085174000 | -0.000022000 |
|           | 6  | 0.683192000  | -4.302756000 | -0.002090000 |           | 6  | -4.330743000 | 0.098397000  | -0.000002000 |
|           | 6  | -0.683192000 | -4.302756000 | 0.002080000  |           | 6  | -4.085174000 | 1.441057000  | 0.000022000  |
|           | 1  | 1.257696000  | -5.223064000 | -0.003816000 |           | 16 | 3.579350000  | 2.472362000  | -0.000036000 |
|           | 1  | -1.257696000 | -5.223064000 | 0.003804000  |           | 16 | 2.472362000  | -3.579350000 | 0.000036000  |
|           | 1  | -5.223064000 | 1.257696000  | -0.003804000 |           | 16 | -3.579350000 | -2.472362000 | -0.000036000 |
|           | 1  | -5.223064000 | -1.257696000 | 0.003816000  |           | 16 | -2.472362000 | 3.579350000  | 0.000036000  |
|           | 1  | -1.257696000 | 5.223064000  | -0.003816000 |           | 9  | -5.577814000 | -0.394882000 | -0.000010000 |
|           | 1  | 1.257696000  | 5.223064000  | 0.003804000  |           | 9  | -5.076995000 | 2.343689000  | 0.000036000  |
|           | 1  | 5.223064000  | 1.257696000  | 0.003816000  |           | 9  | -0.394882000 | 5.577814000  | 0.000010000  |
|           | 1  | 5.223064000  | -1.257696000 | -0.003804000 |           | 9  | 2.343689000  | 5.076995000  | -0.000036000 |
|           | 16 | -3.064647000 | 3.064647000  | -0.006835000 |           | 9  | 5.076995000  | -2.343689000 | 0.000036000  |
|           | 16 | 3.064647000  | 3.064647000  | 0.006835000  |           | 9  | 5.577814000  | 0.394882000  | -0.000010000 |

|           |    |              |              |              |           |    |              |              |              |
|-----------|----|--------------|--------------|--------------|-----------|----|--------------|--------------|--------------|
|           | 16 | 3.064647000  | -3.064647000 | -0.006835000 |           | 9  | 0.394882000  | -5.577814000 | 0.000010000  |
|           | 16 | -3.064647000 | -3.064647000 | 0.006835000  |           | 9  | -2.343689000 | -5.076995000 | -0.000036000 |
| <b>3a</b> | 6  | -0.824315000 | 1.695803000  | 0.182027000  | <b>3b</b> | 6  | -0.298873000 | -1.882605000 | 0.123824000  |
|           | 6  | -1.765340000 | 0.659991000  | -0.187750000 |           | 6  | 1.092471000  | -1.562507000 | -0.120070000 |
|           | 6  | 1.765337000  | -0.659973000 | -0.187759000 |           | 6  | -1.092472000 | 1.562504000  | -0.120102000 |
|           | 6  | -1.695800000 | -0.824307000 | -0.182012000 |           | 6  | 1.882607000  | -0.298876000 | -0.123801000 |
|           | 6  | 0.824312000  | -1.695786000 | 0.181998000  |           | 6  | 0.298875000  | 1.882609000  | 0.123769000  |
|           | 6  | -0.659982000 | -1.765329000 | 0.187738000  |           | 6  | 1.562506000  | 1.092473000  | 0.120064000  |
|           | 6  | 0.659982000  | 1.765345000  | 0.187763000  |           | 6  | -1.562505000 | -1.092470000 | 0.120108000  |
|           | 6  | 1.695792000  | 0.824318000  | -0.182022000 |           | 6  | -1.882607000 | 0.298873000  | -0.123792000 |
|           | 6  | 2.965708000  | 1.404722000  | -0.470211000 |           | 6  | -3.266683000 | 0.581673000  | -0.317343000 |
|           | 6  | 1.117206000  | 3.082756000  | 0.484335000  |           | 6  | -2.684076000 | -1.952620000 | 0.308304000  |
|           | 6  | -1.404732000 | 2.965719000  | 0.470213000  |           | 6  | -0.581676000 | -3.266678000 | 0.317398000  |
|           | 6  | -3.082762000 | 1.117192000  | -0.484316000 |           | 6  | 1.952622000  | -2.684082000 | -0.308237000 |
|           | 6  | -2.965709000 | -1.404723000 | -0.470214000 |           | 6  | 3.266681000  | -0.581681000 | -0.317358000 |
|           | 6  | -1.117180000 | -3.082753000 | 0.484327000  |           | 6  | 2.684079000  | 1.952628000  | 0.308225000  |
|           | 6  | 1.404713000  | -2.965698000 | 0.470207000  |           | 6  | 0.581678000  | 3.266686000  | 0.317303000  |
|           | 6  | 3.082751000  | -1.117195000 | -0.484349000 |           | 6  | -1.952625000 | 2.684074000  | -0.308292000 |
|           | 6  | -3.333969000 | -2.735335000 | -0.267677000 |           | 6  | 4.312600000  | 0.323004000  | -0.199406000 |
|           | 6  | -2.409637000 | -3.573846000 | 0.295736000  |           | 6  | 4.019809000  | 1.597588000  | 0.181391000  |
|           | 6  | -3.573866000 | 2.409636000  | -0.295700000 |           | 6  | 1.597585000  | -4.019810000 | -0.181384000 |
|           | 6  | -2.735341000 | 3.333985000  | 0.267678000  |           | 6  | 0.323009000  | -4.312598000 | 0.199439000  |
|           | 6  | 2.409687000  | 3.573821000  | 0.295824000  |           | 6  | -4.019807000 | -1.597583000 | 0.181473000  |
|           | 6  | 3.334025000  | 2.735299000  | -0.267578000 |           | 6  | -4.312602000 | -0.323010000 | -0.199356000 |
|           | 6  | 3.573805000  | -2.409688000 | -0.295856000 |           | 6  | -1.597587000 | 4.019805000  | -0.181480000 |
|           | 6  | 2.735291000  | -3.334009000 | 0.267578000  |           | 6  | -0.323007000 | 4.312604000  | 0.199323000  |
|           | 1  | 4.605203000  | -2.646233000 | -0.534524000 |           | 34 | 3.754241000  | -2.349810000 | -0.640209000 |
|           | 1  | 3.068163000  | -4.340399000 | 0.497970000  |           | 34 | -2.349799000 | -3.754235000 | 0.640286000  |
|           | 1  | -4.340327000 | -3.068245000 | -0.498164000 |           | 34 | 2.349805000  | 3.754252000  | 0.640161000  |
|           | 1  | -2.646132000 | -4.605283000 | 0.534283000  |           | 34 | -3.754247000 | 2.349793000  | -0.640238000 |
|           | 1  | -4.605319000 | 2.646105000  | -0.534187000 |           | 9  | 5.575853000  | -0.088351000 | -0.399829000 |
|           | 1  | -3.068248000 | 4.340348000  | 0.498145000  |           | 9  | 4.976495000  | 2.520731000  | 0.375840000  |
|           | 1  | 2.646204000  | 4.605236000  | 0.534438000  |           | 9  | 0.088348000  | 5.575861000  | 0.399727000  |
|           | 1  | 4.340422000  | 3.068169000  | -0.497945000 |           | 9  | -2.520727000 | 4.976488000  | -0.375955000 |
|           | 34 | -4.289276000 | -0.205549000 | -1.007190000 |           | 9  | -5.575857000 | 0.088340000  | -0.399780000 |
|           | 34 | -0.205514000 | 4.289318000  | 1.007124000  |           | 9  | -4.976492000 | -2.520720000 | 0.375956000  |
|           | 34 | 0.205515000  | -4.289230000 | 1.007244000  |           | 9  | -0.088344000 | -5.575850000 | 0.399882000  |

|           |             |              |              |              |              |              |              |              |              |
|-----------|-------------|--------------|--------------|--------------|--------------|--------------|--------------|--------------|--------------|
|           | 34          | 4.289279000  | 0.205480000  | -1.007174000 |              | 9            | 2.520724000  | -4.976499000 | -0.375841000 |
| <b>4a</b> | 6           | 0.705947000  | 1.723322000  | 0.000000000  | <b>4b</b>    | 6            | 0.705902000  | 1.723486000  | 0.000000000  |
|           | 6           | -0.705947000 | 1.723322000  | 0.000000000  |              | 6            | -0.705902000 | 1.723486000  | 0.000000000  |
|           | 6           | 0.705947000  | -1.723322000 | 0.000000000  |              | 6            | 0.705902000  | -1.723486000 | 0.000000000  |
|           | 6           | -1.723322000 | 0.705947000  | 0.000000000  |              | 6            | -1.723486000 | 0.705902000  | 0.000000000  |
|           | 6           | -0.705947000 | -1.723322000 | 0.000000000  |              | 6            | -0.705902000 | -1.723486000 | 0.000000000  |
|           | 6           | -1.723322000 | -0.705947000 | 0.000000000  |              | 6            | -1.723486000 | -0.705902000 | 0.000000000  |
|           | 6           | 1.723322000  | 0.705947000  | 0.000000000  |              | 6            | 1.723486000  | 0.705902000  | 0.000000000  |
|           | 6           | 1.723322000  | -0.705947000 | 0.000000000  |              | 6            | 1.723486000  | -0.705902000 | 0.000000000  |
|           | 6           | 2.974301000  | -1.373960000 | 0.000000000  |              | 6            | 2.966638000  | -1.381980000 | 0.000000000  |
|           | 6           | 2.974301000  | 1.373960000  | 0.000000000  |              | 6            | 2.966638000  | 1.381980000  | 0.000000000  |
|           | 6           | 1.373960000  | 2.974301000  | 0.000000000  |              | 6            | 1.381980000  | 2.966638000  | 0.000000000  |
|           | 6           | -1.373960000 | 2.974301000  | 0.000000000  |              | 6            | -1.381980000 | 2.966638000  | 0.000000000  |
|           | 6           | -2.974301000 | 1.373960000  | 0.000000000  |              | 6            | -2.966638000 | 1.381980000  | 0.000000000  |
|           | 6           | -2.974301000 | -1.373960000 | 0.000000000  |              | 6            | -2.966638000 | -1.381980000 | 0.000000000  |
|           | 6           | -1.373960000 | -2.974301000 | 0.000000000  |              | 6            | -1.381980000 | -2.966638000 | 0.000000000  |
|           | 6           | 1.373960000  | -2.974301000 | 0.000000000  |              | 6            | 1.381980000  | -2.966638000 | 0.000000000  |
|           | 6           | -4.205052000 | 0.694587000  | 0.000000000  |              | 6            | -4.188344000 | 0.691968000  | 0.000000000  |
|           | 6           | -4.205052000 | -0.694587000 | 0.000000000  |              | 6            | -4.188344000 | -0.691968000 | 0.000000000  |
|           | 6           | -0.694587000 | 4.205052000  | 0.000000000  |              | 6            | -0.691968000 | 4.188344000  | 0.000000000  |
|           | 6           | 0.694587000  | 4.205052000  | 0.000000000  |              | 6            | 0.691968000  | 4.188344000  | 0.000000000  |
|           | 6           | 4.205052000  | 0.694587000  | 0.000000000  |              | 6            | 4.188344000  | 0.691968000  | 0.000000000  |
|           | 6           | 4.205052000  | -0.694587000 | 0.000000000  |              | 6            | 4.188344000  | -0.691968000 | 0.000000000  |
|           | 6           | 0.694587000  | -4.205052000 | 0.000000000  |              | 6            | 0.691968000  | -4.188344000 | 0.000000000  |
|           | 6           | -0.694587000 | -4.205052000 | 0.000000000  |              | 6            | -0.691968000 | -4.188344000 | 0.000000000  |
|           | 1           | 1.243223000  | -5.142221000 | 0.000000000  |              | 7            | -2.747165000 | 2.747165000  | 0.000000000  |
|           | 1           | -1.243223000 | -5.142221000 | 0.000000000  |              | 7            | 2.747165000  | 2.747165000  | 0.000000000  |
|           | 1           | -5.142221000 | 1.243223000  | 0.000000000  |              | 7            | 2.747165000  | -2.747165000 | 0.000000000  |
|           | 1           | -5.142221000 | -1.243223000 | 0.000000000  |              | 7            | -2.747165000 | -2.747165000 | 0.000000000  |
|           | 1           | -1.243223000 | 5.142221000  | 0.000000000  |              | 9            | -1.379296000 | -5.349039000 | 0.000000000  |
|           | 1           | 1.243223000  | 5.142221000  | 0.000000000  |              | 9            | 1.379296000  | -5.349039000 | 0.000000000  |
|           | 1           | 5.142221000  | 1.243223000  | 0.000000000  |              | 9            | 5.349039000  | -1.379296000 | 0.000000000  |
|           | 1           | 5.142221000  | -1.243223000 | 0.000000000  |              | 9            | 5.349039000  | 1.379296000  | 0.000000000  |
|           | 1           | -3.451823000 | 3.451823000  | 0.000000000  |              | 9            | 1.379296000  | 5.349039000  | 0.000000000  |
|           | 1           | -3.451823000 | -3.451823000 | 0.000000000  |              | 9            | -1.379296000 | 5.349039000  | 0.000000000  |
| 1         | 3.451823000 | -3.451823000 | 0.000000000  | 9            | -5.349039000 | 1.379296000  | 0.000000000  |              |              |
| 1         | 3.451823000 | 3.451823000  | 0.000000000  | 9            | -5.349039000 | -1.379296000 | 0.000000000  |              |              |

|   |              |              |             |   |              |              |             |
|---|--------------|--------------|-------------|---|--------------|--------------|-------------|
| 7 | -2.740524000 | 2.740524000  | 0.000000000 | 1 | 3.458641000  | -3.458641000 | 0.000000000 |
| 7 | 2.740524000  | 2.740524000  | 0.000000000 | 1 | 3.458641000  | 3.458641000  | 0.000000000 |
| 7 | 2.740524000  | -2.740524000 | 0.000000000 | 1 | -3.458641000 | 3.458641000  | 0.000000000 |
| 7 | -2.740524000 | -2.740524000 | 0.000000000 | 1 | -3.458641000 | -3.458641000 | 0.000000000 |

**Table S2** The intermolecular interaction energies of dimers **1a-4a** obtained by using functional M06 in conjugation with three different basis sets

|           | 6-31G(d,p) | 6-311G(d,p) | 6-311+G(d,p) |
|-----------|------------|-------------|--------------|
| <b>1a</b> | 1.12       | 1.30        | 1.33         |
| <b>2a</b> | 1.4        | 1.66        | 1.75         |
| <b>3a</b> | 1.34       | 1.57        | 1.64         |
| <b>4a</b> | 1.12       | 1.32        | 1.35         |
